# Supplementary material for: BCL11B is positioned upstream of PLZF and RORγt to control thymic development of mucosal-associated invariant T cells and MAIT17 program
Source: PubMed Central journal article supplement — iScience. 2021 Mar 13;24(4):102307. doi: 10.1016/j.isci.2021.102307 (PMC8042176; doi:10.1016/j.isci.2021.102307), 2021-03-13
Supplement: mmc1.pdf [file mmc1.pdf]

**Supplemental information**

**BCL11B is positioned upstream of PLZF  
and ROR $\gamma$ t to control thymic development of mucosal-associated in-  
variant T cells and MAIT17 program**

**Theodore T. Drashansky, Eric Y. Helm, Nina Curkovic, Jaimee Cooper, Pingyan Cheng, Xianghong Chen, Namrata Gautam, Lingsong Meng, Alexander J. Kwiatkowski, William O. Collins, Benjamin G. Keselowsky, Derek Sant'Angelo, Zhiguang Huo, Weizhou Zhang, Liang Zhou, and Dorina Avram**

## Supplementary Information

### Supplementary Figures

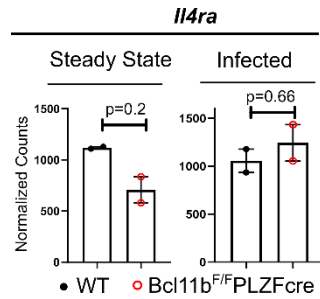

**Figure S1, related to Figure 2. *IL4Ra* mRNA levels are high in MAIT cells and not altered by *Bcl11b* removal.** DESeq2 normalized counts for *IL4Ra* in *Bcl11b* KO and WT MAIT cells in lung at steady state or following *Salmonella* infection. RNA-seq was performed on sorted lin-TCR $\beta$  +MR1t-5-OP-RU+ MAIT cells from lung of *Bcl11b*<sup>F/F</sup>PLZFcre/R26R-EYFP mice and WT control mice at steady state or infected with *Salmonella* Typhimurium BRD509 (*Salmonella*) intranasally, day 7 post infection. For *Bcl11b*<sup>F/F</sup> PLZFcre/R26R-EYFP mice, in addition to lin-TCR $\beta$  + MR1t-5-OP-RU+, sorting was conducted on YFP+ cells. Additional details are provided in Fig. 5 and Material and Methods. False discovery rate (FDR)–adjusted *p* values were calculated using the Benjamini-Hochberg method with a significance cutoff of adjusted *p* < 0.05.

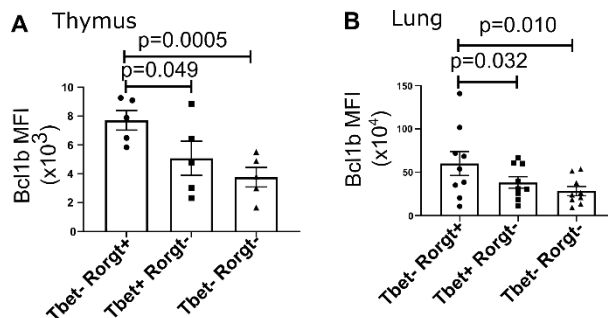

**Figure S2, related to Figure 3. *Bcl11b* levels in MAIT functional subsets. (A and B) *Bcl11b* MFI in MAIT1, MAIT17 and double negative WT MAIT cells in the thymus (A) and lungs (B) of**

uninfected mice. Student's t-test was used for statistical analysis.  $p < 0.05$  was considered significant.

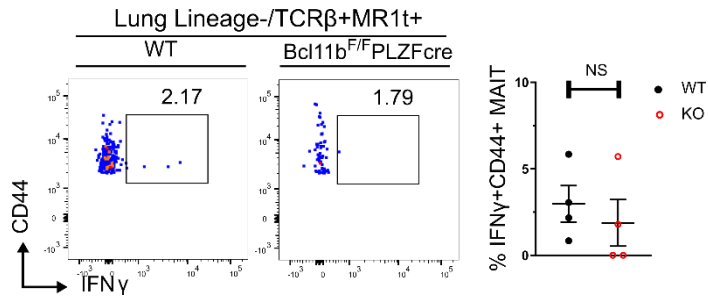

**Figure S3, related to Figure 3. IFN $\gamma$  levels are low and equal in Bcl11b KO and WT MAIT cells at steady state.** Representative dot plots (left) and frequencies (right) of Bcl11b KO and WT IFN $\gamma$ +CD44+ MR1t-5-OP-RU+ TCR $\beta$  lin- MAIT cells in lung at steady state. Each point represents a concatenated file of 2 lung samples run independently. Statistics were conducted as paired t-test.  $p < 0.05$  was considered significant.

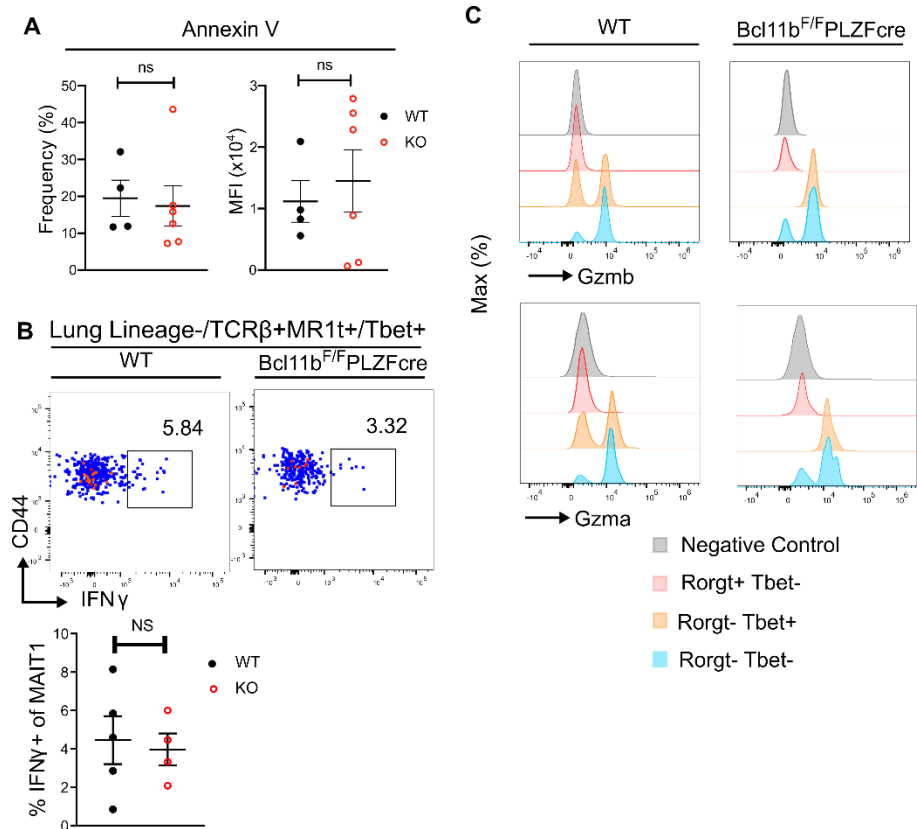

**Figure S4, related to Figure 4. Analysis of Bcl11b KO and WT MAIT cells following *Salmonella* BRD509 infection.** Bcl11b<sup>F/F</sup> PLZFcre and WT mice were infected with *Salmonella* BRD509 intranasally and euthanized 7 days post infection. **(A)** Frequencies and MFI of Annexin V staining of Bcl11b KO and WT MR1t-5-OP-RU+ MAIT cells in the lung following *Salmonella* infection. **(B)** Representative dot plots and frequencies of IFN $\gamma$ +CD44+ MR1t-5-OP-RU+ MAIT cells following *Salmonella* infection. **(C)** Representative histograms of GzmB and GzmA staining in Bcl11b KO and WT MAIT17, MAIT1 and Ror $\gamma$ t-Tbet- MR1t-5-OP-RU+ MAIT cells in the lung of infected mice. Negative control represents gated lineage+ TCR $\beta$ - cells. Statistics were conducted as paired t-test.  $p < 0.05$  was considered significant.

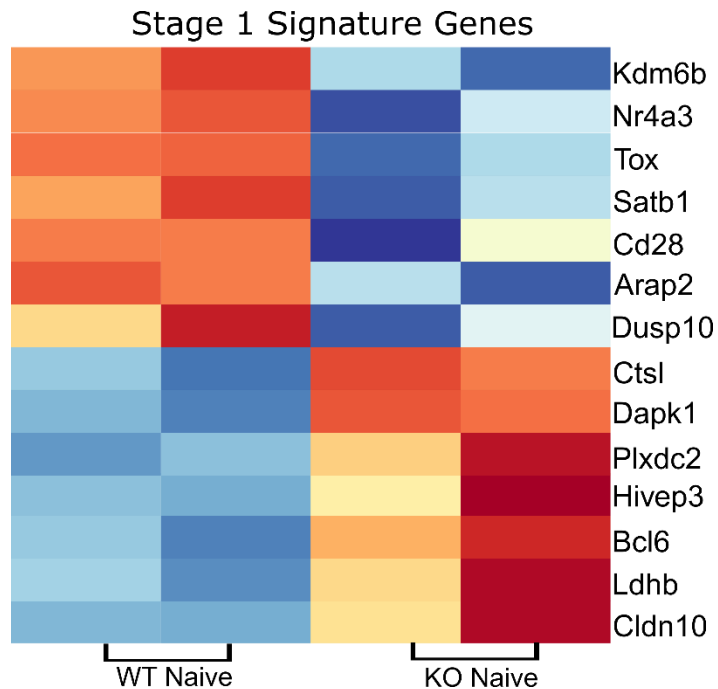

**Figure S5, related to Figure 5. Stage 1 signature genes in lung MAIT cells in the absence of Bcl11b.** RNA-seq was performed on sorted lin<sup>-</sup> TCR $\beta$  + MR1t-5-OP-RU+ MAIT cells from lung of Bcl11b<sup>F/F</sup>PLZFcre/R26R-EYFP mice and WT control mice at steady state. For Bcl11b<sup>F/F</sup> PLZFcre/R26R-EYFP mice, in addition to TCR $\beta$  +MR1t+, sorting was conducted on YFP+ cells. Heatmaps of differentially expressed stage 1 genes in lung Bcl11b KO and WT MR1t-5-OP-RU+ MAIT cells at steady state.

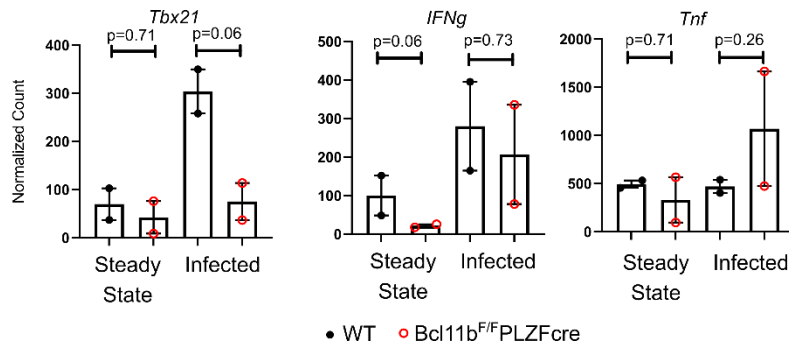

**Figure S6, related to Figure 5. MAIT1 genes are not significantly altered in the absence of Bcl11b at steady state or following infection.** DESeq2 normalized counts for *Tbx21*, *Ifn $\gamma$*  and *Tnf* in Bcl11b KO and WT MAIT cells in lung at steady state or following *Salmonella* infection. RNA-seq was performed on sorted lin<sup>-</sup> TCR $\beta$ <sup>+</sup>MR1t-5-OP-RU<sup>+</sup> MAIT cells from lung of Bcl11b<sup>F/F</sup>PLZFcre/R26R-EYFP mice and WT control mice at steady state or infected with *Salmonella* Typhimurium BRD509 (*Salmonella*) intranasally, day 7 post infection. For Bcl11b<sup>F/F</sup> PLZFcre/R26R-EYFP mice, in addition to lin<sup>-</sup> TCR $\beta$ <sup>+</sup> MR1t-5-OP-RU<sup>+</sup>, sorting was conducted on YFP<sup>+</sup> cells. Additional details are provided in Fig. 5 and Material and Methods. False discovery rate (FDR)–adjusted *p* values were calculated using the Benjamini-Hochberg method, with a significance cutoff of adjusted *p* < 0.05.

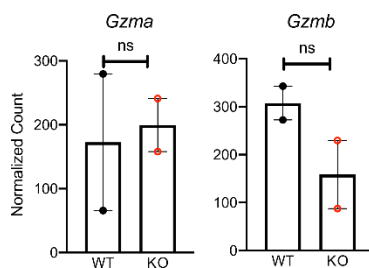

**Figure S7, related to Figure 5. Granzyme mRNAs are unaffected by Bcl11b deletion in MAIT cells.** DESeq2 normalized counts for *Gzma* and *Gzmb* in lung of Bcl11b KO and WT

MAIT cells from *Salmonella* infected mice. RNA-seq was performed on sorted lin<sup>-</sup> TCRβ<sup>+</sup> MR1t-5-OP-RU<sup>+</sup> MAIT cells from lung of Bcl11b<sup>F/F</sup> PLZFcre/R26R-EYFP mice and WT control mice at steady state or infected with *Salmonella* Typhimurium BRD509 (*Salmonella*) intranasally, day 7 post infection. For Bcl11b<sup>F/F</sup> PLZFcre/R26R-EYFP mice, in addition to lin<sup>-</sup> TCRβ<sup>+</sup> MR1t-5-OP-RU<sup>+</sup>, sorting was conducted on YFP<sup>+</sup> cells. Additional details are provided in Fig. 5 and Material and Methods. False discovery rate (FDR)-adjusted *p* values were calculated using the Benjamini-Hochberg method, with a significance cutoff of adjusted *p* < 0.05.

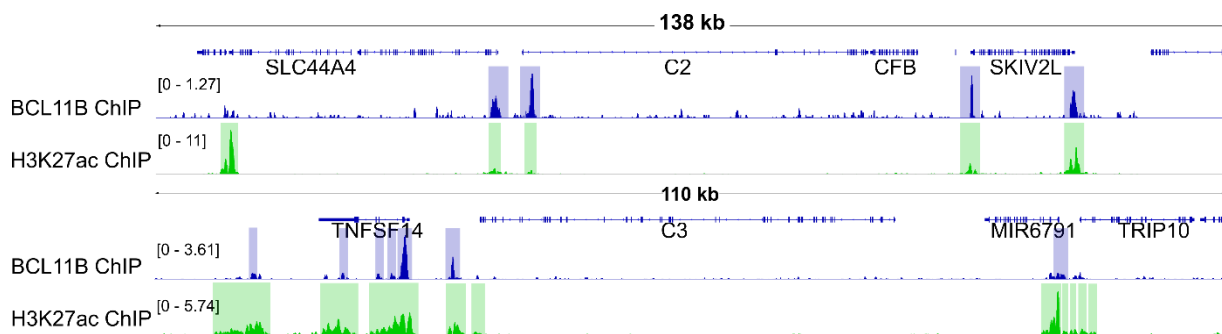

**Figure S8, related to Figure 8. Bcl11b binding ant H3K27Ac at C2 and C3 complement loci in human MAIT cells from healthy donors.** IGV visualization of C2 and C3 loci from Bcl11b ChIP-seq (track 1) and H3K27Ac (track 2) human MAIT cells. Blue and green highlights indicate significant ChIP-seq peaks. ChIP-seq scale bar normalized to sequences per million reads.

**Table S3. MAIT17 program genes and differential expression at steady state or infection**  
(compiled from Koay et al. 2019), related to Figure 5.

| <b>Genes</b>    | <b>DEG in Bcl11b KO versus WT - steady state</b> | <b>DEG in Bcl11b KO versus WT - infection</b> |
|-----------------|--------------------------------------------------|-----------------------------------------------|
| <i>Blk</i>      | down                                             | down                                          |
| <i>Pxdc1</i>    | down                                             | down                                          |
| <i>S100a4</i>   | down                                             | down                                          |
| <i>Actn2</i>    | down                                             | down                                          |
| <i>Aqp3</i>     | down                                             | NC                                            |
| <i>Cd7</i>      | down                                             | NC                                            |
| <i>Apol7b</i>   | down                                             | down                                          |
| <i>Tnfrsf25</i> | down                                             | down                                          |
| <i>Stab2</i>    | down                                             | NC                                            |
| <i>Emb</i>      | down                                             | down                                          |
| <i>Sdc1</i>     | down                                             | NC                                            |
| <i>Itgae</i>    | down                                             | down                                          |
| <i>Ramp1</i>    | down                                             | down                                          |
| <i>Ramp3</i>    | down                                             | down                                          |
| <i>Icos</i>     | down                                             | down                                          |
| <i>Il27ra</i>   | down                                             | down                                          |
| <i>Il12rb</i>   | down                                             | down                                          |
| <i>Cd44</i>     | down                                             | down                                          |
| <i>Ccr2</i>     | down                                             | down                                          |
| <i>Zbtb16</i>   | down                                             | down                                          |
| <i>Maf</i>      | down                                             | down                                          |
| <i>Il7r</i>     | down                                             | down                                          |
| <i>Il18r1</i>   | down                                             | down                                          |
| <i>Il17a</i>    | down                                             | down                                          |
| <i>Il23r</i>    | down                                             | down                                          |



|                 |      |      |
|-----------------|------|------|
| <i>Il17rb</i>   | down | down |
| <i>Il1r1</i>    | down | down |
| <i>Il17re</i>   | down | down |
| <i>Rorc</i>     | down | down |
| <i>Ccr6</i>     | down | down |
| <i>Tmem176a</i> | NC   | NC   |
| <i>Serpib1a</i> | NC   | down |
| <i>Tmem176b</i> | NC   | NC   |
| <i>Lrrc17</i>   | NC   | NC   |
| <i>Lrrc58</i>   | NC   | NC   |
| <i>Cabin1</i>   | NC   | down |
| <i>Chad</i>     | NC   | NC   |
| <i>Kcnk1</i>    | NC   | NC   |
| <i>Avpi1</i>    | NC   | NC   |
| <i>Prelid1</i>  | NC   | NC   |
| <i>Jag1</i>     | NC   | up   |
| <i>Mycn</i>     | NC   | NC   |
| <i>Rnf208</i>   | NC   | down |
| <i>Il17f</i>    | NC   | down |
| <i>Il22</i>     | NC   | NC   |
| <i>Cxcl2</i>    | NC   | up   |
| <i>Itifb</i>    | NC   | NC   |

**Table S4. MAIT1 program genes and differential expression at steady state or infection**  
(compiled from Koay et al. 2019), related to Figure 5.

| <b>Genes</b>     | <b>DEG in Bcl11b KO versus WT - steady state</b> | <b>DEG in Bcl11b KO versus WT - infection</b> |
|------------------|--------------------------------------------------|-----------------------------------------------|
| <i>Klrk1</i>     | NC                                               | NC                                            |
| <i>Fgl2</i>      | down                                             | NC                                            |
| <i>Cd28</i>      | down                                             | down                                          |
| <i>Il2rb</i>     | down                                             | down                                          |
| <i>Satb1</i>     | down                                             | NC                                            |
| <i>Nkg7</i>      | NC                                               | NC                                            |
| <i>Klrd1</i>     | NC                                               | NC                                            |
| <i>Ly6c2</i>     | NC                                               | up                                            |
| <i>Klrb1c</i>    | NC                                               | NC                                            |
| <i>Gzmb</i>      | NC                                               | NC                                            |
| <i>Gimap3</i>    | NC                                               | NC                                            |
| <i>Klra3</i>     | NC                                               | NC                                            |
| <i>Ms4a4b</i>    | NC                                               | NC                                            |
| <i>Klra9</i>     | NC                                               | NC                                            |
| <i>AW112010</i>  | NC                                               | NC                                            |
| <i>Slamf7</i>    | NC                                               | up                                            |
| <i>Klrc2</i>     | NC                                               | NC                                            |
| <i>Hsd11b1</i>   | NC                                               | NC                                            |
| <i>H2-Q6</i>     | NC                                               | NC                                            |
| <i>Stat4</i>     | NC                                               | down                                          |
| <i>Klra5</i>     | NC                                               | NC                                            |
| <i>Klrc1</i>     | NC                                               | NC                                            |
| <i>Styk1</i>     | NC                                               | NC                                            |
| <i>Klra13-ps</i> | NC                                               | NC                                            |
| <i>Itga4</i>     | NC                                               | NC                                            |

|                |    |      |
|----------------|----|------|
| <i>H2-K1</i>   | NC | NC   |
| <i>Klra6</i>   | NC | NC   |
| <i>Klra8</i>   | NC | NC   |
| <i>Klra10</i>  | NC | NC   |
| <i>Klrc2</i>   | NC | NC   |
| <i>Klre</i>    | NC | NC   |
| <i>Ugcg</i>    | NC | NC   |
| <i>Inpp4b</i>  | NC | NC   |
| <i>Bcl2</i>    | NC | NC   |
| <i>Itm2a</i>   | NC | NC   |
| <i>Ccl5</i>    | NC | NC   |
| <i>Ifng</i>    | NC | NC   |
| <i>Il21r</i>   | NC | NC   |
| <i>Xcl1</i>    | NC | NC   |
| <i>Cxcr3</i>   | NC | down |
| <i>Ccl4</i>    | NC | up   |
| <i>Ccr9</i>    | NC | NC   |
| <i>Ccl3</i>    | NC | up   |
| <i>Lef1</i>    | NC | NC   |
| <i>Il10ra</i>  | NC | up   |
| <i>Il18rap</i> | NC | NC   |
| <i>Cxcr4</i>   | NC | NC   |

**Table S5. CD4+Lef1+CD138-CD319- early stage 3 precursor program genes and differential expression at steady state or infection (compiled from Koay et al. 2019), related to Figure 5.**

| <b>Genes</b> | <b>DEG in Bcl11b KO versus WT - steady state</b> | <b>DEG in Bcl11b KO versus WT - infection</b> |
|--------------|--------------------------------------------------|-----------------------------------------------|
| <i>Satb1</i> | down                                             | NC                                            |
| <i>Tcf7</i>  | down                                             | down                                          |
| <i>Cd4</i>   | NC                                               | up                                            |
| <i>Lef1</i>  | NC                                               | NC                                            |
| <i>Itm2a</i> | NC                                               | NC                                            |
| <i>Cd27</i>  | NC                                               | NC                                            |

**Table S6. TCR Signaling pathway genes and differential expression at steady state or infection, related to Figure 5.**

| <b>Genes</b>         | <b>DEG in Bcl11b KO versus WT - steady state</b> | <b>DEG in Bcl11b KO versus WT - infection</b> |
|----------------------|--------------------------------------------------|-----------------------------------------------|
| <i>Pdpk1</i>         | NC                                               | NC                                            |
| <i>Bcl10</i>         | NC                                               | NC                                            |
| <i>Cd247</i>         | NC                                               | NC                                            |
| <i>Cd28</i>          | down                                             | down                                          |
| <i>Cd3d</i>          | down                                             | Down                                          |
| <i>Cd3e</i>          | down                                             | Down                                          |
| <i>Cd3g</i>          | down                                             | Down                                          |
| <i>Cd4</i>           | NC                                               | up                                            |
| <i>Cd40l</i>         | down                                             | down                                          |
| <i>Cd8a</i>          | NC                                               | NC                                            |
| <i>Cd8b1</i>         | NC                                               | NC                                            |
| <i>Fos</i>           | NC                                               | NC                                            |
| <i>Fyn</i>           | NC                                               | down                                          |
| <i>Grap2</i>         | down                                             | down                                          |
| <i>Hras</i>          | NC                                               | NC                                            |
| <i>Itk</i>           | down                                             | down                                          |
| <i>Kras</i>          | NC                                               | NC                                            |
| <i>Malt1</i>         | NC                                               | up                                            |
| <i>Rasgrp1</i>       | down                                             | Down                                          |
| <i>4930544G11Rik</i> | NC                                               | NC                                            |
| <i>Card11</i>        | down                                             | Down                                          |
| <i>Cdc42</i>         | NC                                               | NC                                            |
| <i>Csf2</i>          | NC                                               | NC                                            |
| <i>Chuk</i>          | NC                                               | NC                                            |
| <i>Cdk4</i>          | NC                                               | NC                                            |
| <i>Ctla4</i>         | NC                                               | down                                          |
| <i>Dlg1</i>          | NC                                               | NC                                            |
| <i>Gsk3b</i>         | NC                                               | NC                                            |

|                |      |      |
|----------------|------|------|
| <i>Grb2</i>    | NC   | NC   |
| <i>Icos</i>    | down | down |
| <i>Ikbkb</i>   | NC   | NC   |
| <i>Ikbkg</i>   | NC   | NC   |
| <i>Ifng</i>    | NC   | NC   |
| <i>Jun</i>     | NC   | NC   |
| <i>Lat</i>     | down | down |
| <i>Lck</i>     | down | down |
| <i>Mapk1</i>   | NC   | NC   |
| <i>Mapk11</i>  | NC   | NC   |
| <i>Mapk12</i>  | NC   | NC   |
| <i>Mapk13</i>  | up   | NC   |
| <i>Mapk14</i>  | NC   | NC   |
| <i>Mapk3</i>   | NC   | NC   |
| <i>Map2k1</i>  | NC   | NC   |
| <i>Map2k2</i>  | NC   | NC   |
| <i>Map2k7</i>  | NC   | NC   |
| <i>Map3k14</i> | down | down |
| <i>Map3k7</i>  | NC   | NC   |
| <i>Map3k8</i>  | NC   | NC   |
| <i>Nras</i>    | NC   | NC   |
| <i>Nck1</i>    | NC   | NC   |
| <i>Nck2</i>    | NC   | NC   |
| <i>Nfatc1</i>  | down | Down |
| <i>Nfatc2</i>  | NC   | Down |
| <i>Nfatc3</i>  | down | down |
| <i>Nfkb1</i>   | NC   | NC   |
| <i>Nfkbia</i>  | NC   | NC   |
| <i>Nfkbib</i>  | NC   | NC   |
| <i>Nfkbie</i>  | Down | NC   |
| <i>Pak1</i>    | NC   | up   |
| <i>Pak2</i>    | NC   | NC   |
| <i>Pak3</i>    | NC   | NC   |
| <i>Pak4</i>    | NC   | NC   |
| <i>Pak5</i>    | NC   | NC   |
| <i>Pak6</i>    | NC   | NC   |
| <i>Pak7</i>    | NC   | NC   |
| <i>Pik3r3</i>  | NC   | NC   |
| <i>Pik3cd</i>  | down | NC   |
| <i>Pik3ca</i>  | NC   | NC   |
| <i>Pik3cb</i>  | NC   | up   |
| <i>Pik3r1</i>  | NC   | NC   |
| <i>Pik3r2</i>  | NC   | Up   |
| <i>Pik3cg</i>  | down | NC   |
| <i>Pik3r5</i>  | NC   | NC   |
| <i>Plcg1</i>   | NC   | down |
| <i>Pdcd1</i>   | down | down |
| <i>Ppp3ca</i>  | NC   | NC   |
| <i>Ppp3cb</i>  | NC   | down |

|               |      |      |
|---------------|------|------|
| <i>Ppp3cc</i> | NC   | NC   |
| <i>Ppp3r1</i> | NC   | NC   |
| <i>Ppp3r2</i> | NC   | NC   |
| <i>Ptpn6</i>  | NC   | NC   |
| <i>Ptpnc</i>  | down | NC   |
| <i>Rhoa</i>   | NC   | NC   |
| <i>Sos1</i>   | NC   | NC   |
| <i>Sos2</i>   | NC   | NC   |
| <i>Tec</i>    | NC   | NC   |
| <i>Raf1</i>   | NC   | NC   |
| <i>Rela</i>   | NC   | NC   |
| <i>Vav1</i>   | NC   | NC   |
| <i>Vav2</i>   | NC   | NC   |
| <i>Vav3</i>   | NC   | up   |
| <i>Zap70</i>  | down | down |

**Table S7. Key Resources Table. Antibodies.**

| <b>Antibody</b>                           | <b>SOURCE</b>  | <b>IDENTIFIER</b> |
|-------------------------------------------|----------------|-------------------|
| Anti-mouse T-bet, BV421                   | Biologend      | Cat #: 644816     |
| Anti-mouse granzyme A, eFluor450          | eBioscience    | Cat #: 48-4831-82 |
| Anti-mouse CD45.2 eFluor506               | eBioscience    | Cat #: 69-0454-82 |
| Anti-mouse CD44, BV510                    | Biologend      | Cat #: 103044     |
| Anti-mouse TCR $\beta$ , Super Bright 600 | eBioscience    | Cat #: 63-5961-82 |
| Anti-mouse B220, BV650                    | Biologend      | Cat #: 103241     |
| Anti-mouse CD11c, BV650                   | Biologend      | Cat #: 117339     |
| Anti-mouse GR1, BV650                     | Biologend      | Cat #: 108442     |
| Anti-mouse CD45.1, Super Bright 702       | eBioscience    | Cat #: 67-0453-82 |
| Anti-mouse TNF, BV750                     | Biologend      | Cat #: 506358     |
| Anti-mouse IFN $\gamma$ , BV785           | Biologend      | Cat #: 17-6988-82 |
| Anti-mouse MR1-5-OP-RU, PE or APC         | NTCF           | N/A               |
| Anti-mouse MR1-6-FP, PE or APC            | NTCF           | N/A               |
| Anti-mouse granzyme B, PE/CF594           | BD Biosciences | Cat #: 562462     |
| Anti-mouse IL-17A, PE/cy7                 | eBioscience    | Cat #: 25-7177-82 |
| Anti-mouse/human Bcl11b, rabbit           | Bethyl Labs    | Cat #: A300-385A  |
| Goat-anti-rabbit secondary, AlexaFluor488 | ThermoFisher   | Cat #: A11008     |
| Anti-mouse PLZF, PerCP/cy5.5              | Biologend      | Cat #: 145808     |
| Anti-mouse Ror $\gamma$ t, APC            | eBioscience    | Cat #: 17-6988-82 |

|                                     |             |                   |
|-------------------------------------|-------------|-------------------|
| Fixable viability dye, eFluor780    | eBioscience | Cat #: 65-0865-14 |
| Anti-mouse CD8a, Super Bright 702   | eBioscience | Cat #: 67-0081-82 |
| Anti-mouse Ki67, AlexFluor700       | Biolegend   | Cat #: 652420     |
| Annexin V, Pacific Blue             | eBioscience | Cat #: 640918     |
| Anti-human CD3, PerCP/cy5.5         | Biolegend   | Cat #: 317338     |
| Anti-human CD161, PE/Texas Red      | Biolegend   | Cat #: 339940     |
| Anti-human TCRV $\alpha$ 7.2, BV421 | Biolegend   | Cat #: 351716     |
| Anti-human CD4, Biotin              | Biolegend   | Cat #: 317438     |
| Anti-human CD11b, Biotin            | Biolegend   | Cat #: 301304     |
| Anti-human CD14, Biotin             | Biolegend   | Cat #: 301826     |
| Anti-mouse T-bet, PE/cy7            | eBioscience | Cat #: 25-5825-82 |
| Anti-mouse CD24, BV605              | Biolegend   | Cat #: 101827     |
| Anti-mouse CD69, PerCP/cy5.5        | Biolegend   | Cat #: 104522     |
| Anti-mouse CD8a, BV785              | Biolegend   | Cat #: 100750     |
| Anti-mouse CD44, APC/cy7            | Biolegend   | Cat #: 103028     |
| Anti-mouse TCR $\beta$ , eFluor450  | eBioscience | Cat #: 48-5961-82 |
| Anti-mouse CD62L, BV711             | Biolegend   | Cat #: 104445     |
| Anti-Streptavidin, PE               | Agilent     | Cat #: PJRS25     |

## Transparent Methods

**Mice.** PLZFcre<sup>+</sup> mice (Zhang et al. 2015) were bred with Bcl11b<sup>F/F</sup> mice, on a C57BL/6 background, to generate Bcl11b<sup>F/F</sup> PLZFcre<sup>+</sup> (KO) and Bcl11b<sup>F/F</sup> (WT) mice and further with R26R-EYFP mice to generate Bcl11b<sup>F/F</sup> PLZFcre/R26R-EYFP mice. Both males and females of 6-8 weeks of age were used in all experiments conducted. Littermates of the same sex were used, as WT and KO mice. Mice were bred and maintained under specific pathogen-free conditions and kept in-house for experiments in individually ventilated cages under specific pathogen-free conditions. All experiments were conducted according to animal protocols approved by Institutional Animal Care and Use Committees of University of Florida, Moffitt Cancer Center and University of South Florida.

*Salmonella* Typhimurium BRD509 Infections. *Salmonella enterica* ser. Typhimurium BRD509 was provided by Dr. Stephen J. McSorley of UC- Davis.  $10^6$  cfu of *Salmonella* was instilled intranasally and mice were euthanized after 7 days.

**Human Subjects.** PBMCs derived buffy coats of healthy volunteers were purchased from LifeSouth Community Blood Centers. MAIT cells were sorted as CD3+CD161+TCRV $\alpha$ 7.2+ cells.

**Bone Marrow Chimeras.** Cells were isolated from bone marrows (BM) of Bcl11b<sup>F/F</sup> PLZF-Cre<sup>+</sup> (KO) (CD45.2) and WT (CD45.1/2) mice and mixed at a 1:1 ratio. 10 million BM cells were injected i.v. into lethally irradiated CD45.1 recipient mice. Prior to transfer CD45.1 mice were irradiated 2 times, 4 hours apart with 550 rad. Mice were analyzed 8 weeks post-transplant.

**MR1 tetramer.** Biotinylated MR1-5-OP-RU and MR1-6-FP monomers were obtained from the National Institutes of Health Tetramer Core Facility and were tetramerized with Streptavidin-PE or -APC. Tetramer was titrated on WT MAIT cells from thymus and lung.

**Cell Isolation and analysis.** Cell isolation was performed as previously described by VanValkenburgh *et al.* (Vanvalkenburgh et al. 2011). Briefly, cells from all lymphoid organs were placed on 40  $\mu$ m filter and pressed through the filter while washed with 1% FBS complete RPMI medium. Lungs were processed using the gentleMACS Dissociator in 1% FBS complete RPMI medium with 10mg/mL of Collagenase A and 5 $\mu$ g/mL of DNase I with the protocol for setting Lung 1, followed by for 30 minutes incubation at 37C with shaking at 220rpm. Digestion was stopped with 50  $\mu$ L of 0.5M of EDTA. and further Lung setting 2 protocol was conducted. Tissue was passed through 40  $\mu$ m filter and washed with additional 1% FBS complete RPMI medium, centrifuged at 350 x g for 10 minutes. The pellets were resuspended in 30% Percoll and layered on top of 70% Percoll and centrifuged at 2500rpm for 20 minutes. For analysis of cytokine production, cells were resuspended in 10% complete RPMI media at a concentration of  $1 \times 10^8$



cells/ml in the presence of PMA and ionomycin, at a final concentration of 25ng/ml and 1µg/mL, respectively for 5 hours with Brefeldin A added to a final concentration of 0.3µM, for the last 4 hours.

For thymic MAIT cells only, a CD8+ T cell negative selection enrichment kit was used in total thymocytes, given that in the thymus MAIT cells are rarely CD4+ or DP.

For the lung cells, no enrichment was used, however cells were stained with a cocktail of B220, Gr1, Cd11b (all PE-Cy7) (dump gate, (lin+)), as well as for TCRβ and with MR1t-5-OP-RU. TCRβ and with MR1t-5-OP-RU+ cells were analyzed in the lin- population.

Antibodies and fluorophores information is provided in Table S7.

**RNA-seq library preparation.** RNA was extracted from sort-purified WT and Bcl11b KO (YFP+) lin- TCRβ + MR1t-5-OP-RU+ MAIT cells from *Salmonella* BRD509 infected or uninfected Bcl11b<sup>F/F</sup> (WT) and Bcl11b<sup>F/F</sup> PLZFcre<sup>+</sup> Rosa26YFP<sup>+</sup> mice, using the RNeasy Plus Micro Kit (QIAGEN 74034), and rRNA was depleted using NEBNext rRNA Depletion Kit (NEB E63102). cDNA libraries were prepared using NEBNext Ultra II RNA Library Prep Kit (NEB E7770S), quality was assessed on a Bioanalyzer (Agilent, #5067-4626), and sequenced on a HiSeq3000 at approximately 30 million reads per library.

**BCL11B ChIP-seq.** Human MAIT cells were sort purified from PBMCs as CD3+CD161+TCRVα7.2+ cells derived from nine donors. ChIP-Seq against Bcl11b was performed on MAIT cells using the SimpleChIP Enzymatic Chromatin IP Kit from Cell Signaling Technologies (CST #9003), following their recommended protocol up to the library preparation with the following alterations: (1) 10<sup>7</sup> cells were used in place of 4 × 10<sup>7</sup>; (2) formaldehyde fixation was performed in 1 mL; (3) Buffer A and Buffer B steps were performed in 1 mL; (4) cells were sheared in ChIP-buffer to an average of 200-1000bp using a Diagenode Bioruptor Pico (Diagenode B01060002); (5) a cocktail of 3 anti-Bcl11b antibodies

were used (8mg ab18465, 8 mg of CST #12120 and 8mg of Bethyl A300-385 per ChIP); (6) final DNA purification was performed by phenol:chloroform:isoamyl alcohol extraction with MaXtract high density columns (Qiagen #129046). Libraries were prepared using NEBNext Ultra II DNA Library Prep Kit (NEB #E7645S) and sequenced as PE 2x100 on a HiSeq3000.

**H3K27ac ChIP-seq.** ChIP-seq for H3K27ac was performed on two independent samples derived from two donors. 100,000 sort purified human MAIT cells (CD3+CD161+TCRV $\alpha$ 7.2+ using the Low Cell ChIP-Seq kit from Active Motif (#104895) following strictly the manufacturer's recommended protocol scaled to 100,000 cells. H3K27ac antibody was from Cell Signaling Technologies (#8173) at the recommended 1:100 dilution. Libraries were run as PE 2x100 on a HiSeq3000.

## **QUANTIFICATION AND STATISTICAL ANALYSIS**

**RNA-seq Data Processing.** RNA-seq fastq files were trimmed using seqtk and the quality assessed using FastQC (Lorentsen et al. 2018). The trimmed reads were aligned to the mouse genome (mm10) using Hisat2 and transcript counts were obtained using HTseq (Lorentsen et al. 2018). DeSeq2 was used for differential expression analysis (Lorentsen et al. 2018).

Significance for RNA-seq data was determined using DeSeq2 (Love, Huber and Anders 2014).

**ChIP-seq data Processing.** Data analysis for ChIP-seq was performed using a customized pipeline based on a previously published version (Lorentsen et al. 2018). Briefly, fastq files were first trimmed using Trimmomatic and read quality was assessed using FastQC. Reads were aligned to the mouse genome (mm10) using Bowtie2. The resulting SAM file was pruned (Q>30), converted to BAM format and was sorted using SAMtools. Duplicate reads were removed using Picard tools and MACS2 was used for peak calling and bedgraph file preparation. Bedgraph files were visualized using Integrative Genomics Viewer (IGV).

**Statistics.** For the Spearman Correlation plot, tag counts of each peak in Bcl11b and H3K27ac and peak annotation were obtained using HOMER software. Correlation in the tag counts

between Bcl11b and H3K27ac was evaluated using the Spearman's method. P-value was obtained from Student's t-test to examine if the correlation was significant and analysis was carried out in R. For all mouse experiments where the mice were not infected with *Salmonella* BRD509, two files were concatenated to create individual points on the frequency statistics graphs and for representative figures. For all flow cytometry experiments data was analyzed in GraphPad Prism. For single comparisons, we used two-tailed Student's *t*-test, and  $p < 0.05$  were considered significant. In case of multiple groups of mice of different phenotypes, we used an analysis of variance or a Kruskal-Wallis test applicable for continuous variables.

## References

- Koay, H. F., S. Su, D. Amann-Zalcenstein, S. R. Daley, I. Comerford, L. Miosge, C. E. Whyte, I. E. Konstantinov, Y. d'Udekem, T. Baldwin, P. F. Hickey, S. P. Berzins, J. Y. W. Mak, Y. Sontani, C. M. Roots, T. Sidwell, A. Kallies, Z. Chen, S. Nussing, K. Kedzierska, L. K. Mackay, S. R. McColl, E. K. Deenick, D. P. Fairlie, J. McCluskey, C. C. Goodnow, M. E. Ritchie, G. T. Belz, S. H. Naik, D. G. Pellicci & D. I. Godfrey (2019) A divergent transcriptional landscape underpins the development and functional branching of MAIT cells. *Sci Immunol*, 4 (41):eaay6039
- Vanvalkenburgh, J., D. I. Albu, C. Bapanpally, S. Casanova, D. Califano, D. M. Jones, L. Ignatowicz, S. Kawamoto, S. Fagarasan, N. A. Jenkins, N. G. Copeland, P. Liu & D. Avram (2011) Critical role of Bcl11b in suppressor function of T regulatory cells and prevention of inflammatory bowel disease. *J Exp Med*, 208, 2069-81.
- Koay, H. F., S. Su, D. Amann-Zalcenstein, S. R. Daley, I. Comerford, L. Miosge, C. E. Whyte, I. E. Konstantinov, Y. d'Udekem, T. Baldwin, P. F. Hickey, S. P. Berzins, J. Y. W. Mak, Y. Sontani, C. M. Roots, T. Sidwell, A. Kallies, Z. Chen, S. Nussing, K. Kedzierska, L. K. Mackay, S. R. McColl, E. K. Deenick, D. P. Fairlie, J. McCluskey, C. C. Goodnow, M. E. Ritchie, G. T. Belz, S. H. Naik, D. G. Pellicci & D. I. Godfrey (2019) A divergent transcriptional landscape underpins the development and functional branching of MAIT cells. *Sci Immunol*, 4.
- Lorentsen, K. J., J. J. Cho, X. Luo, A. N. Zuniga, J. F. Urban, Jr., L. Zhou, R. Gharaibeh, C. Jobin, M. P. Kladde & D. Avram (2018) Bcl11b is essential for licensing Th2 differentiation during helminth infection and allergic asthma. *Nat Commun*, 9, 1679.
- Love, M. I., W. Huber & S. Anders (2014) Moderated estimation of fold change and dispersion for RNA-seq data with DESeq2. *Genome Biology*, 15, 550.
- Vanvalkenburgh, J., D. I. Albu, C. Bapanpally, S. Casanova, D. Califano, D. M. Jones, L. Ignatowicz, S. Kawamoto, S. Fagarasan, N. A. Jenkins, N. G. Copeland, P. Liu & D. Avram (2011) Critical role of Bcl11b in suppressor function of T regulatory cells and prevention of inflammatory bowel disease. *J Exp Med*, 208, 2069-81.
- Zhang, S., A. Laouar, L. K. Denzin & D. B. Sant'Angelo (2015) Zbtb16 (PLZF) is stably suppressed and not inducible in non-innate T cells via T cell receptor-mediated signaling. *Sci Rep*, 5, 12113.
